# Supplementary material for: Association of DNA Methylation of the NLRP3 Gene with Changes in Cortical Thickness in Major Depressive Disorder
Source: MDPI journal article supplement (doi:10.3390/ijms23105768), 2022-05-21
Supplement: s1 [file s1]

**Table S1.** Demographic and clinical characteristics of MDD patients and HCs (total sample).

| Characteristics                   | MDD (n=220)   | HC (n=82)     | P-value (t, $\chi^2$ )      |
|-----------------------------------|---------------|---------------|-----------------------------|
| Age                               | 44.55 ± 14.43 | 31.17 ± 12.31 | <0.001 (t = 8.003)          |
| Sex (F/M)                         | 153 / 67      | 50 / 32       | 0.158 ( $\chi^2$ = 1.991)   |
| Education level                   |               |               |                             |
| Elementary and middle school      | 66            | 4             |                             |
| High school or college/university | 145           | 72            | <0.001 ( $\chi^2$ = 21.502) |
| Above graduate school             | 9             | 6             |                             |
| HDRS-17 score                     | 17.57 ± 6.68  | 3.74 ± 5.73   | <0.001 (t = 16.587)         |
| Duration of illness (months)      | 27.86 ± 44.72 | NA            | NA                          |
| Drug-naïve / Medicated patients   | 82 / 138      | NA            | NA                          |
| Remitted / Non-remitted patients  | 31 / 189      | NA            | NA                          |
| Medication, n                     |               |               |                             |
| SSRI                              | 53            |               |                             |
| SNRI                              | 32            |               |                             |
| NDRI                              | 7             |               |                             |
| NaSSA                             | 14            |               |                             |
| Other AD                          | 5             | NA            | NA                          |
| Combination of ADs                | 27            |               |                             |
| AP                                | 28            |               |                             |
| Combination of APs                | 6             |               |                             |

Data are mean ± standard deviation for age, HDRS-17 scores, and illness duration.

P-values for distribution of sex and education level were obtained using a chi-squared test.

P-values for comparisons of age and HDRS scores were obtained using an independent t-test.

Abbreviations: MDD, major depressive disorder; HCs, healthy controls; HDRS-17, 17-item Hamilton Depression Rating Scale; SSRI, selective serotonin reuptake inhibitor; SNRI, serotonin and norepinephrine reuptake inhibitor; NDRI, norepinephrine-dopamine reuptake inhibitor; NaSSA, noradrenergic and specific serotonergic antidepressant; Combination of AD, combinations of two or more types of antidepressants; APs, antipsychotics; ADs, antidepressants; NA, not applicable.
